# Supplementary material for: Genotypic and Phenotypic Characteristics of Lactic Acid Bacteria Associated with Forage Plants in the Native Grassland of Western Inner Mongolia and Their Application for Alfalfa Silage Fermentation
Source: MDPI journal article supplement (doi:10.3390/ani14101394), 2024-05-07
Supplement: s1 [file s1]

Table S1 Geographical distribution of forage plants and plant-associated lactic acid bacteria in the native grassland of western Inner Mongolia

| Plant family          | Natural forages                                                        | Geographic coordinates                          | Materials      |             |
|-----------------------|------------------------------------------------------------------------|-------------------------------------------------|----------------|-------------|
|                       |                                                                        |                                                 | Fresh material | 60 d silage |
| <i>Leguminosae</i>    | <i>Caragana stenophylla</i> Pojark                                     | Urat Back Banner, Bayannur (41°40'N, 107°04'E)  | GI2            | GI3, GI4    |
|                       | <i>Ammopiptanthus mongolicus</i> (Maxim.) Cheng f.                     | Urat Back Banner, Bayannur (41°14'N, 103°37'E)  |                | GI5         |
|                       | <i>Caragana microphylla</i> Lam.                                       | Siziwang Banner, Wulanchabu (42°36'N, 111°50'E) |                | GI7, GI8    |
|                       | <i>Caragana intermedia</i> Kuang et H.C. Fu                            | Siziwang Banner, Wulanchabu (41°71'N, 111°63'E) |                | GI9         |
|                       | <i>Alhagi maurorum</i> Medic. var. <i>sparsifolium</i> (Shap.) Yakovl. | Ejin Banner, Alashan (40°04'N, 101°06'E)        |                | GI10, GI11  |
|                       | <i>Hedysarum scoparium</i> Fisch. Et Mey.                              | Hanggin Banner, Ordos (40°58'N, 108°74'E)       |                | GI12        |
|                       | <i>Hedysarum laeve</i> Maxim                                           | Hanggin Banner, Ordos (40°00'N, 107°89'E)       | GI13           | GI14        |
|                       | <i>Ammopiptanthus mongolicus</i> (Maxim.) Cheng f.                     | Alxa Left Banner, Alashan (39°62'N, 105°10'E)   |                | GI15        |
|                       | <i>Sophora alopecurides</i> L.                                         | Ejin Banner, Alashan (41°93'N, 101°03'E)        | GI16, GI17     | GI18, GI19  |
| <i>Chenopodiaceae</i> | <i>Salsola passerina</i> Bunge                                         | Urat Back Banner, Bayannur (41°16'N, 106°49'E)  | GI20           |             |
|                       | <i>Anabasis brevifolia</i> C.A. Mey.                                   | Urat Back Banner, Bayannur (41°72'N, 106°37'E)  |                | GI21        |
|                       | <i>Zygophyllum pterocarpum</i>                                         | Urat Back Banner, Bayannur (41°16'N, 106°49'E)  |                | GI22        |
|                       | <i>Eurotiac eratoides</i> (L.) Mey.                                    | Urat Back Banner, Bayannur (41°40'N, 107°04'E)  |                | GI23, GI24  |
|                       | <i>Haloxylon ammodendron</i> (C. A. Mey.) Bunge                        | Urat Back Banner, Bayannur (41°40'N, 107°04'E)  | GI25           | GI26, GI27  |
|                       | <i>Nitraria tangutorum</i> Bobr                                        | Urat Back Banner, Bayannur (41°14'N, 103°37'E)  | GI28           | GI29        |
|                       | <i>Nitraria tangutorum</i> Bobr                                        | Urat Back Banner, Bayannur (41°16'N, 106°49'E)  | GI39           |             |

Table S1 Geographical distribution of forage plants and plant-associated lactic acid bacteria in the native grassland of western Inner Mongolia (continued table)

| Plant family          | Natural forages                                     | Geographic coordinates                                    | Materials      |             |
|-----------------------|-----------------------------------------------------|-----------------------------------------------------------|----------------|-------------|
|                       |                                                     |                                                           | Fresh material | 60 d silage |
| <i>Chenopodiaceae</i> | <i>Nitraria tangutorum</i> Bobr                     | Urat Central Banner, Bayannur (42°36'N, 107°77'E)         | GI30           | GI31        |
|                       | <i>Zygophyllum pterocarpum</i>                      | Urat Central Banner, Bayannur (42°36'N, 107°77'E)         | GI32           | GI33        |
|                       | <i>Kalidium gracile</i> Fenzl.                      | Urat Central Banner, Bayannur (42°36'N, 107°78'E)         | GI34           | GI35, GI36  |
|                       | <i>Anabasis brevifolia</i> C.A. Mey.                | Urat Central Banner, Bayannur (42°36'N, 107°78'E)         | GI37           | GI38        |
|                       | <i>Haloxylon ammodendron</i> (C. A. Mey.) Bunge     | Alxa Left Banner, Alashan (39°30'N, 105°70'E)             |                | GI40, GI41  |
|                       | <i>Atriplex patens</i> (Litv.) Iljin.               | Alxa Right Banner, Alashan (38°99'N, 101°77'E)            |                | GI42, GI43  |
| <i>Asteraceae</i>     | <i>Ajania achilleoides</i> (Turcz.) Poljak. Et Grub | Urat Back Banner, Bayannur (41°40'N, 107°04'E)            |                | GI44        |
|                       | <i>Echinops gmelinii</i> Turcz.                     | Urat Back Banner, Bayannur (42°36'N, 107°77'E)            | GI45           | GI46        |
|                       | <i>Artemisia sieversiana</i> Ehrhart ex Willd.      | Darhan Muminggan Joint Banner, Baotou (42°61'N, 110°28'E) | GI47, GI48     | GI49, GI50  |
|                       | <i>Artemisia frigida</i> Willd.                     | Siziwang Banner, Wulanchabu (42°39'N, 111°37'E)           |                | GI51        |
|                       | <i>Karelinia caspia</i> (Pall.) Less.               | Ejin Banner, Alashan (40°04'N, 101°06'E)                  | GI52           | GI53        |
|                       | <i>Asterothamnus centrali-asiaticus</i> Novopokr.   | Alxa Left Banner, Alashan (39°04'N, 105°99'E)             | GI54           | GI55        |
|                       | <i>Heteropappus altaicus</i> (Willd.) Novopokr.     | Alxa Left Banner, Alashan (39°04'N, 105°99'E)             |                | GI56, GI57  |
| <i>Zygophyllaceae</i> | <i>Peganum harmala</i> L.                           | Urat Back Banner, Bayannur (41°14'N, 103°37'E)            | GI58           | GI59        |
| <i>Lamiaceae</i>      | <i>Lagochilus ilicifolius</i> Bunge                 | Urat Back Banner, Bayannur (41°40'N, 107°04'E)            | GI60           | GI61, GI62  |
| <i>Cruciferae</i>     | <i>Lepidium latifolium</i> L.                       | Urat Central Banner, Bayannur (42°36'N, 107°77'E)         | GI63           | GI64, GI65  |

Table S1 Geographical distribution of forage plants and plant-associated lactic acid bacteria in the native grassland of western Inner Mongolia (continued table)

| Plant family           | Natural forages                                                | Geographic coordinates                                    | Materials      |             |
|------------------------|----------------------------------------------------------------|-----------------------------------------------------------|----------------|-------------|
|                        |                                                                |                                                           | Fresh material | 60 d silage |
| <i>Liliaceae</i>       | <i>Allium polyrhizum</i> Turcz. ex Regel (florescence)         | Siziwang Banner, Wulanchabu (42°36'N, 111°50'E)           |                | GI66        |
|                        | <i>Allium polyrhizum</i> Turcz. ex Regel (vegetative period)   | Siziwang Banner, Wulanchabu (42°39'N, 111°37'E)           |                | GI67, GI68  |
| <i>Iridaceae</i>       | <i>Iris lactea</i> Pall. Var. <i>chinensis</i> (Fisch.) Koidz. | Darhan Muminggan Joint Banner, Baotou (42°61'N, 110°28'E) |                | GI69, GI70  |
| <i>Rosaceae</i>        | <i>Prunus mongolica</i> Maxim.                                 | Dengkou, Bayannur (40°58'N, 106°32'E)                     | GI71, GI72     | GI73        |
| <i>Caryophyllaceae</i> | <i>Gymnocarpos przewalskii</i> Maxim.                          | Alxa Right Banner, Alashan (38°99'N, 101°77'E)            | GI74           | GI1         |
